# Supplementary figures and images for: Mixed amide–malonate compound of hafnium as a novel monomeric precursor for MOCVD of HfO2thin films
Source: Royal Society of Chemistry journal article supplement (doi:10.1039/b509380e), 2005-12-15

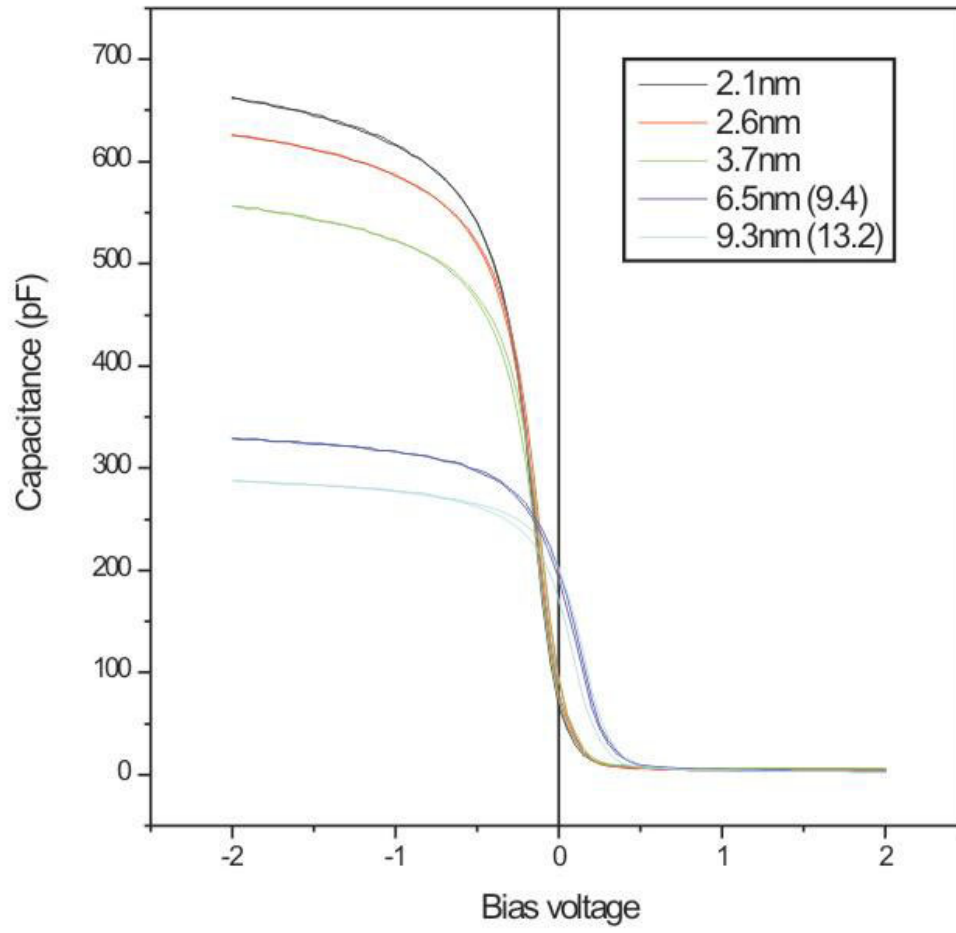

Supplement: b509380e1.pdf [file b509380e1.pdf]

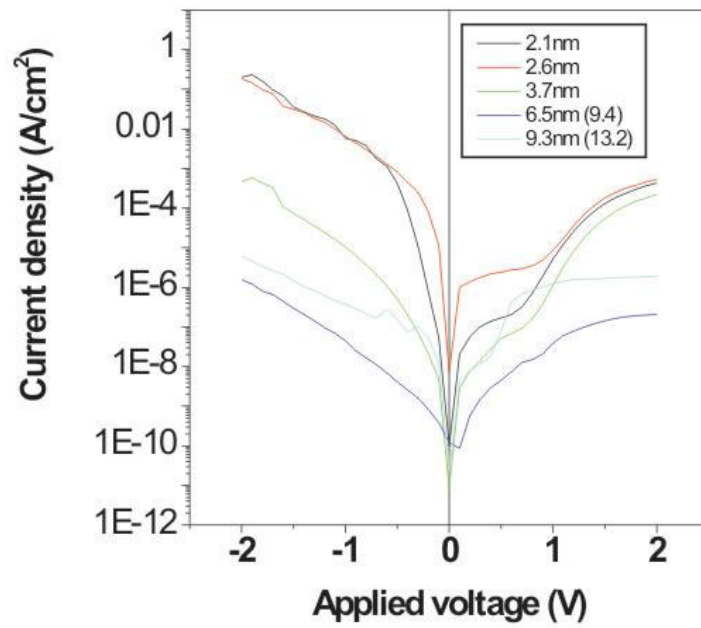

@-1.000V  
0.006 ( 2.1 nm)  
0.006 (2.6nm)  
1.031E-5 ( 3.7 nm)  
4.551E-8 (9.4nm)  
3.704E-7 (13.2nm)

Supplement: b509380e2.pdf [file b509380e2.pdf]

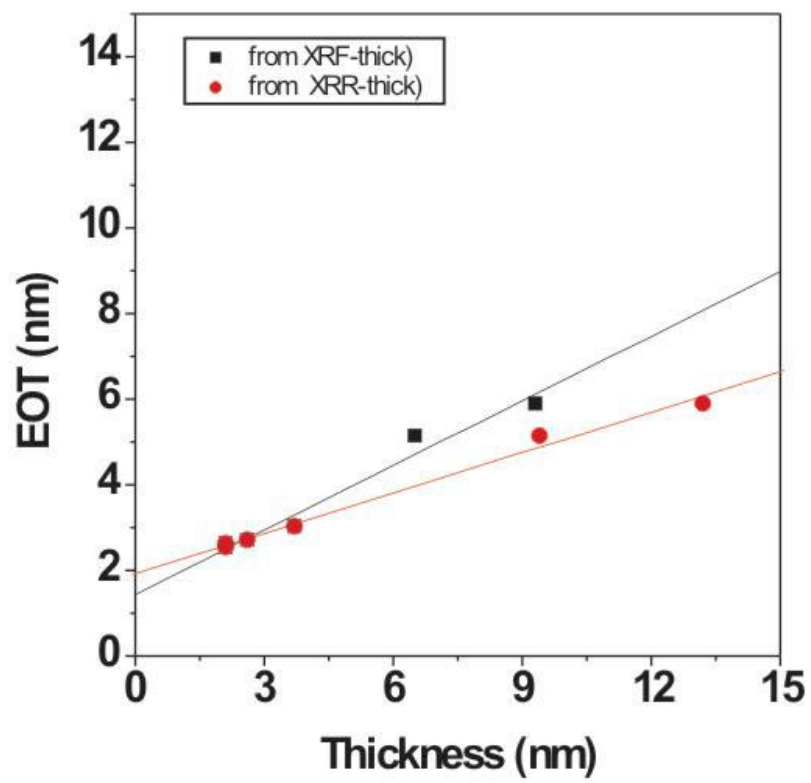

Supplement: b509380e3.pdf [file b509380e3.pdf]
